# Supplementary material
Source: publisher site journal article supplement (https://www.spandidos-publications.com/5099/downloadSupplementary)
Supplement: Supplementary file 1 [file downloadSupplementary]

## Sheet: Table S2
Table SII. The logFC of expression of DNase family genes in tumor and adjacent normal tissues.
Cancer type	DNASE1	DNASE1L1	DNASE1L2	DNASE1L3	DNASE2	DNASE2B
BLCA	0.279949	0.508858	0.524726	-0.958307	0.730581	0.0819728
BRCA	0.285575	0.215191	0.489643	-1.28187	0.768192	0.0368863
CHOL	1.21241	1.48191	0.454534	-3.04281	1.33789	0.0316937
COAD	0.488198	0.298837	0.466783	-2.33813	0.327539	-0.109399
ESCA	-0.375678	0.194351	0.237365	-0.00333851	0.595633	-0.255104
GBM	0.260243	0.228786	0.0568263	0.0761719	1.42162	0.237624
HNSC	0.194606	0.0943413	-0.0396727	-1.16685	0.862901	-0.304491
KICH	0.42859	0.673958	-0.137743	-2.33847	0.620551	0.0500554
KIRC	-1.7664	0.326451	0.130447	-1.93496	0.659578	0.255228
KIRP	-1.57572	0.121507	0.102951	-2.43898	0.492916	0.544616
LIHC	0.342529	0.470375	0.336682	-2.56863	0.593864	0.0529695
LUAD	0.614834	0.0412391	0.244953	-2.02708	-0.199978	-1.24113
LUSC	0.227341	-0.19606	0.255744	-1.78196	0.0352529	-1.29537
PRAD	0.56045	0.225447	0.386084	-0.299641	-0.267849	1.15657
READ	0.704636	0.464895	0.426432	-2.34086	0.274603	-0.141604
STAD	-0.151564	0.243185	0.233034	-1.17667	0.530345	0.170337
THCA	-0.163221	-0.0132186	0.616283	-0.615919	0.140869	0.0823207
UCEC	0.258403	-0.166822	0.44416	-0.543488	0.935278	-0.00048065
